# Supplementary material for: DeepProg: an ensemble of deep-learning and machine-learning models for prognosis prediction using multi-omics data
Source: PubMed Central journal article supplement (PMC8281595; doi:10.1186/s13073-021-00930-x), 2021-07-14

Log features count

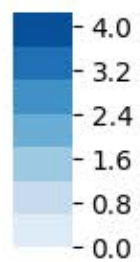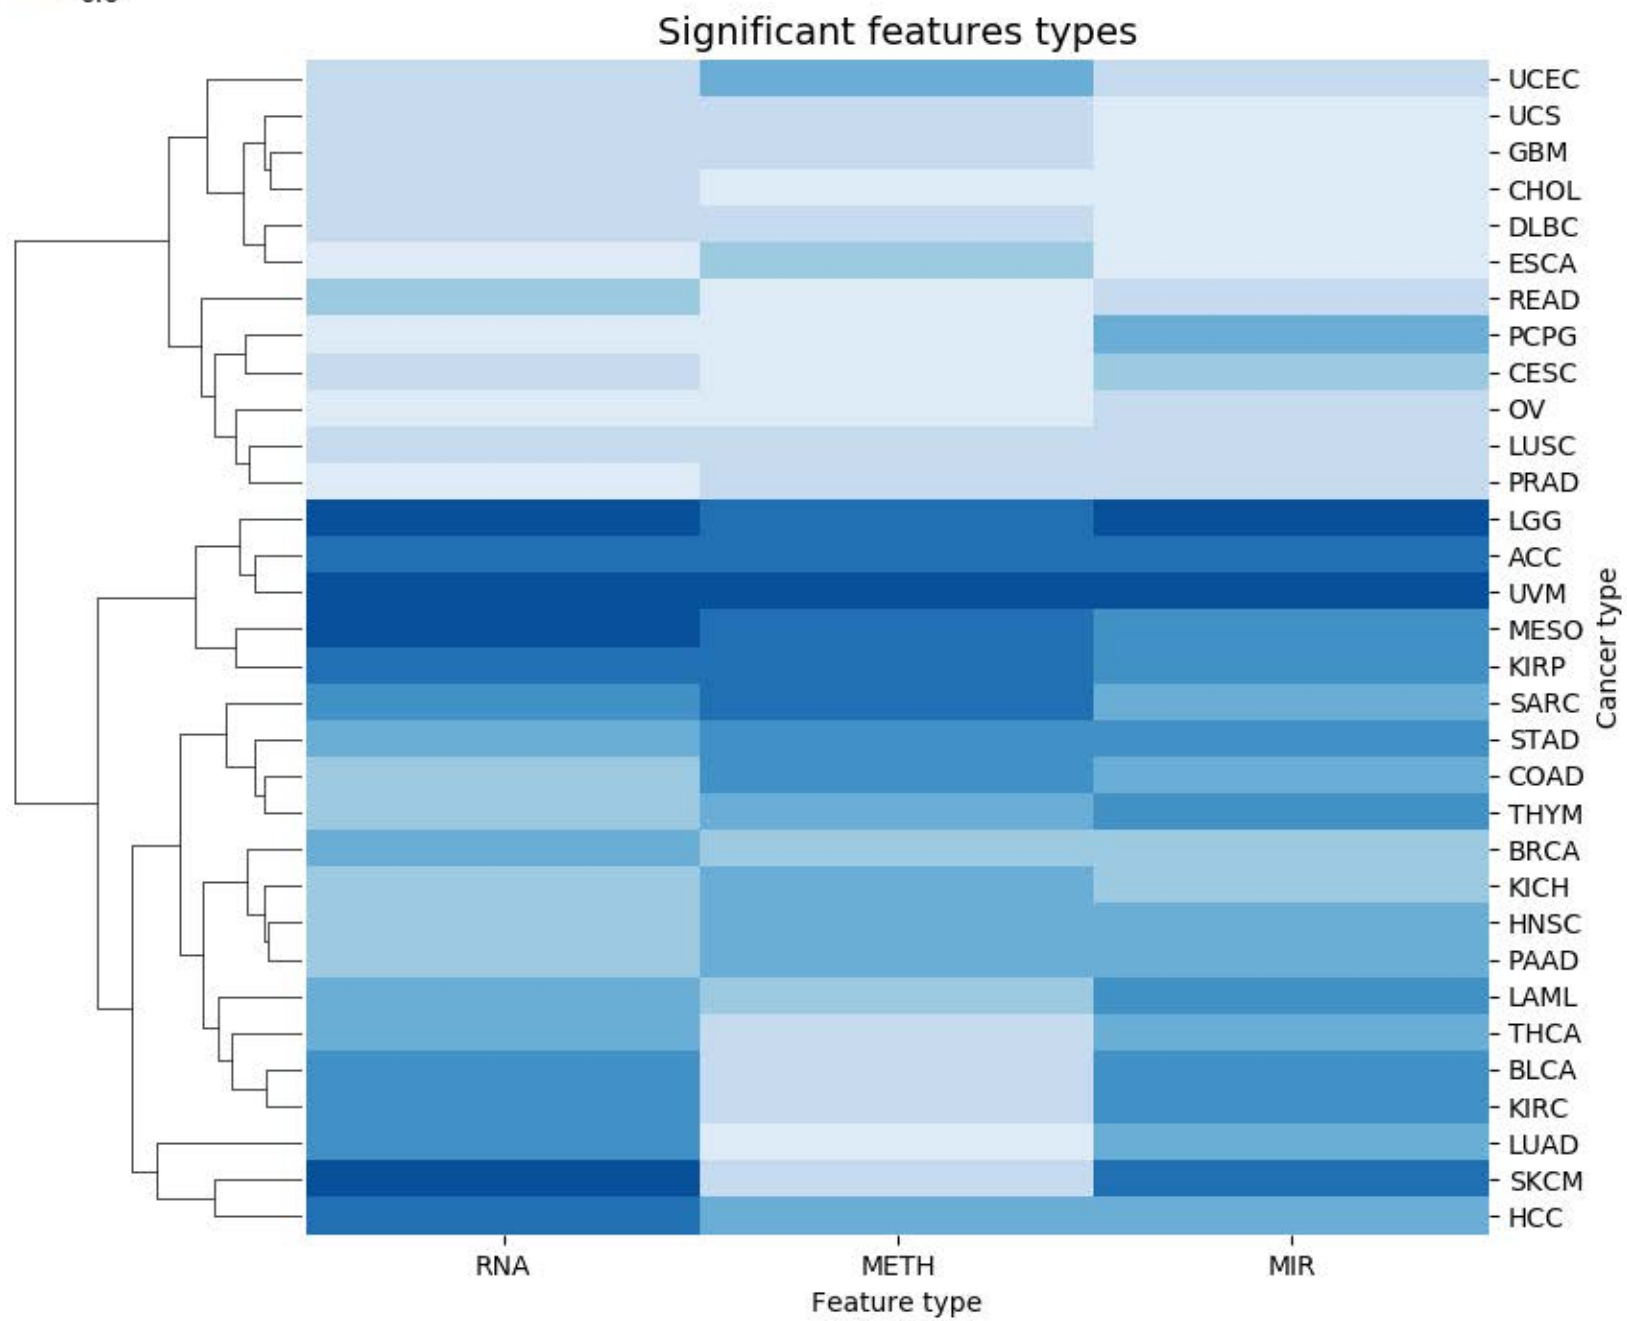

Figure S1

**A**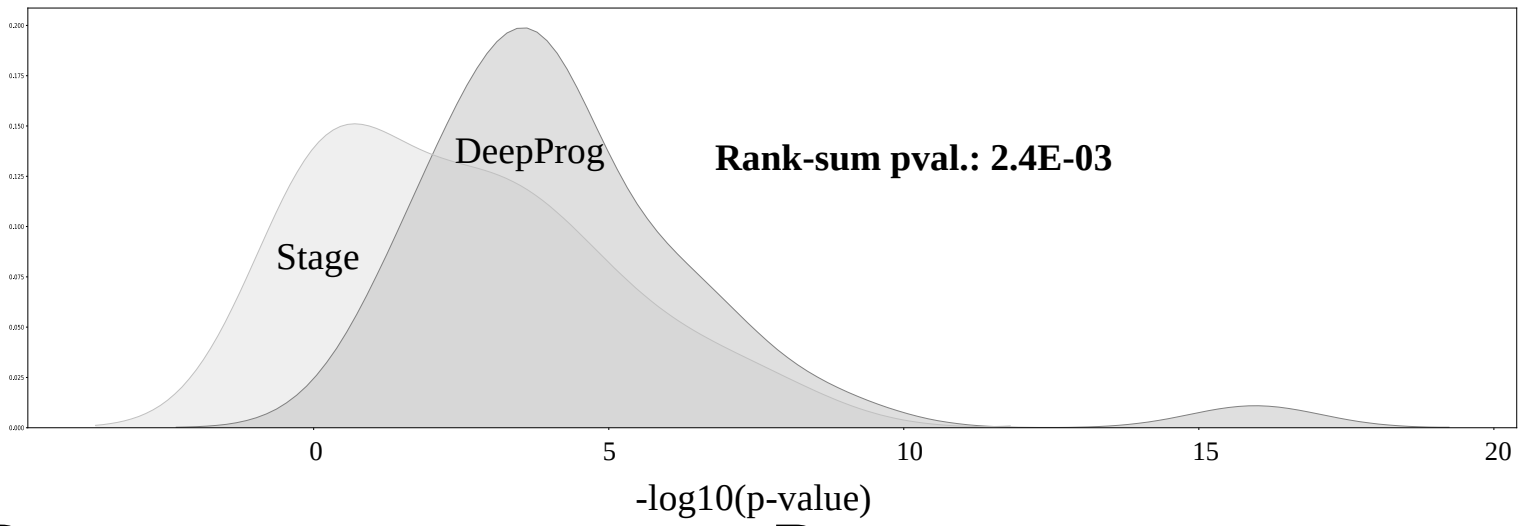**B**

**STAD Stage III / IV clusters**  
 pval.: 2.7e-06 CI: 0.61

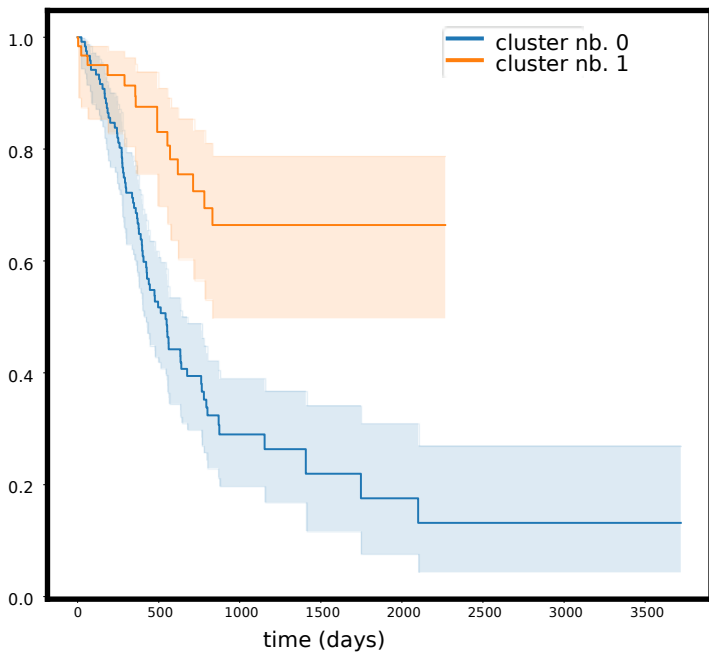**D**

**STAD Stage III / IV clinical**  
 pval.: 1.6e-1 CI: 0.54

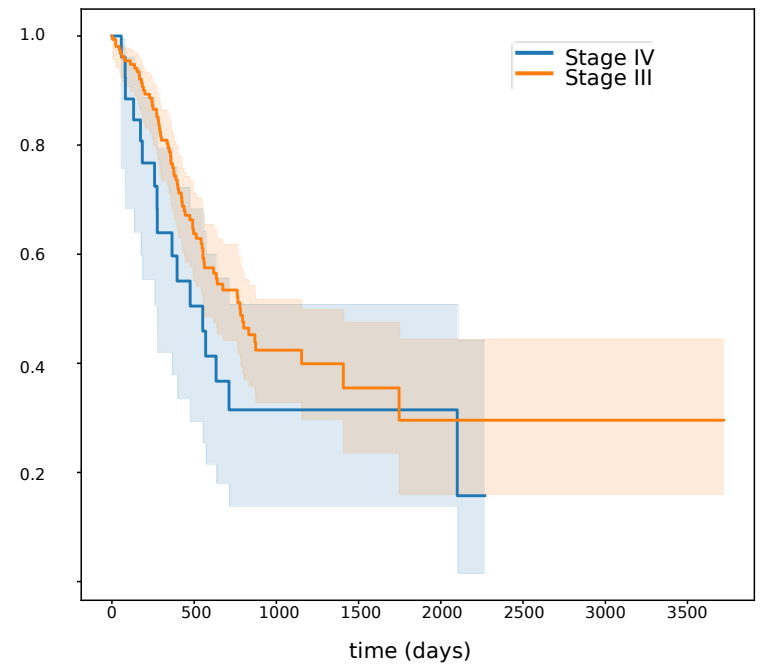**C**

**COAD Stage III / IV clusters**  
 pval.: 5.5e-04 CI: 0.63

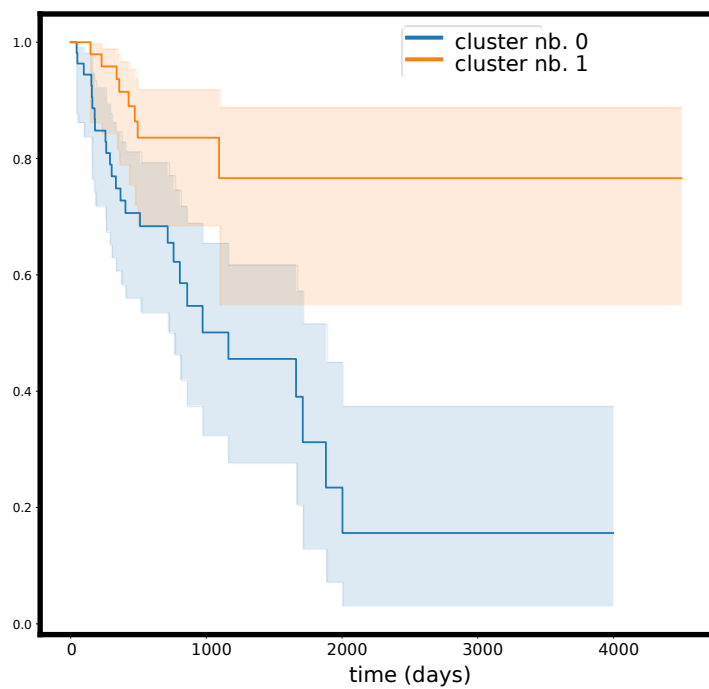**E**

**COAD Stage III / IV clinical**  
 pval.: 1.2e-2 CI: 0.62

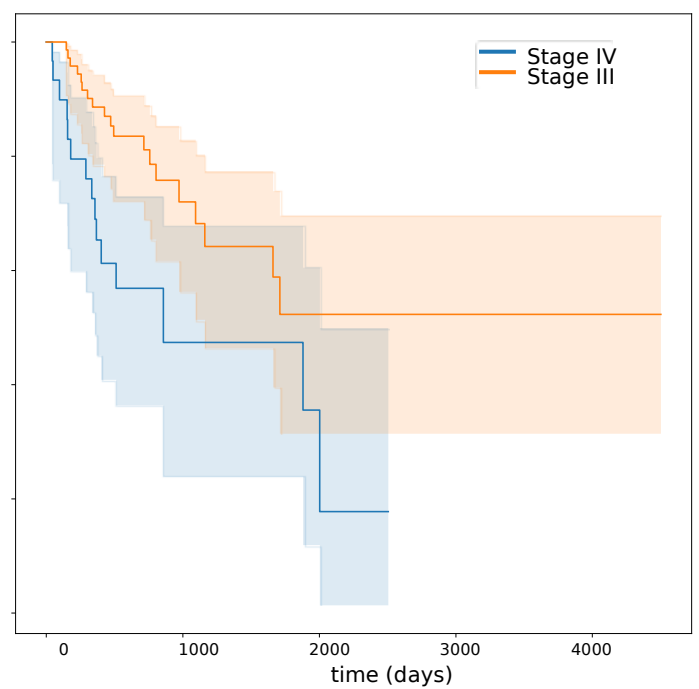

**Figure S2**

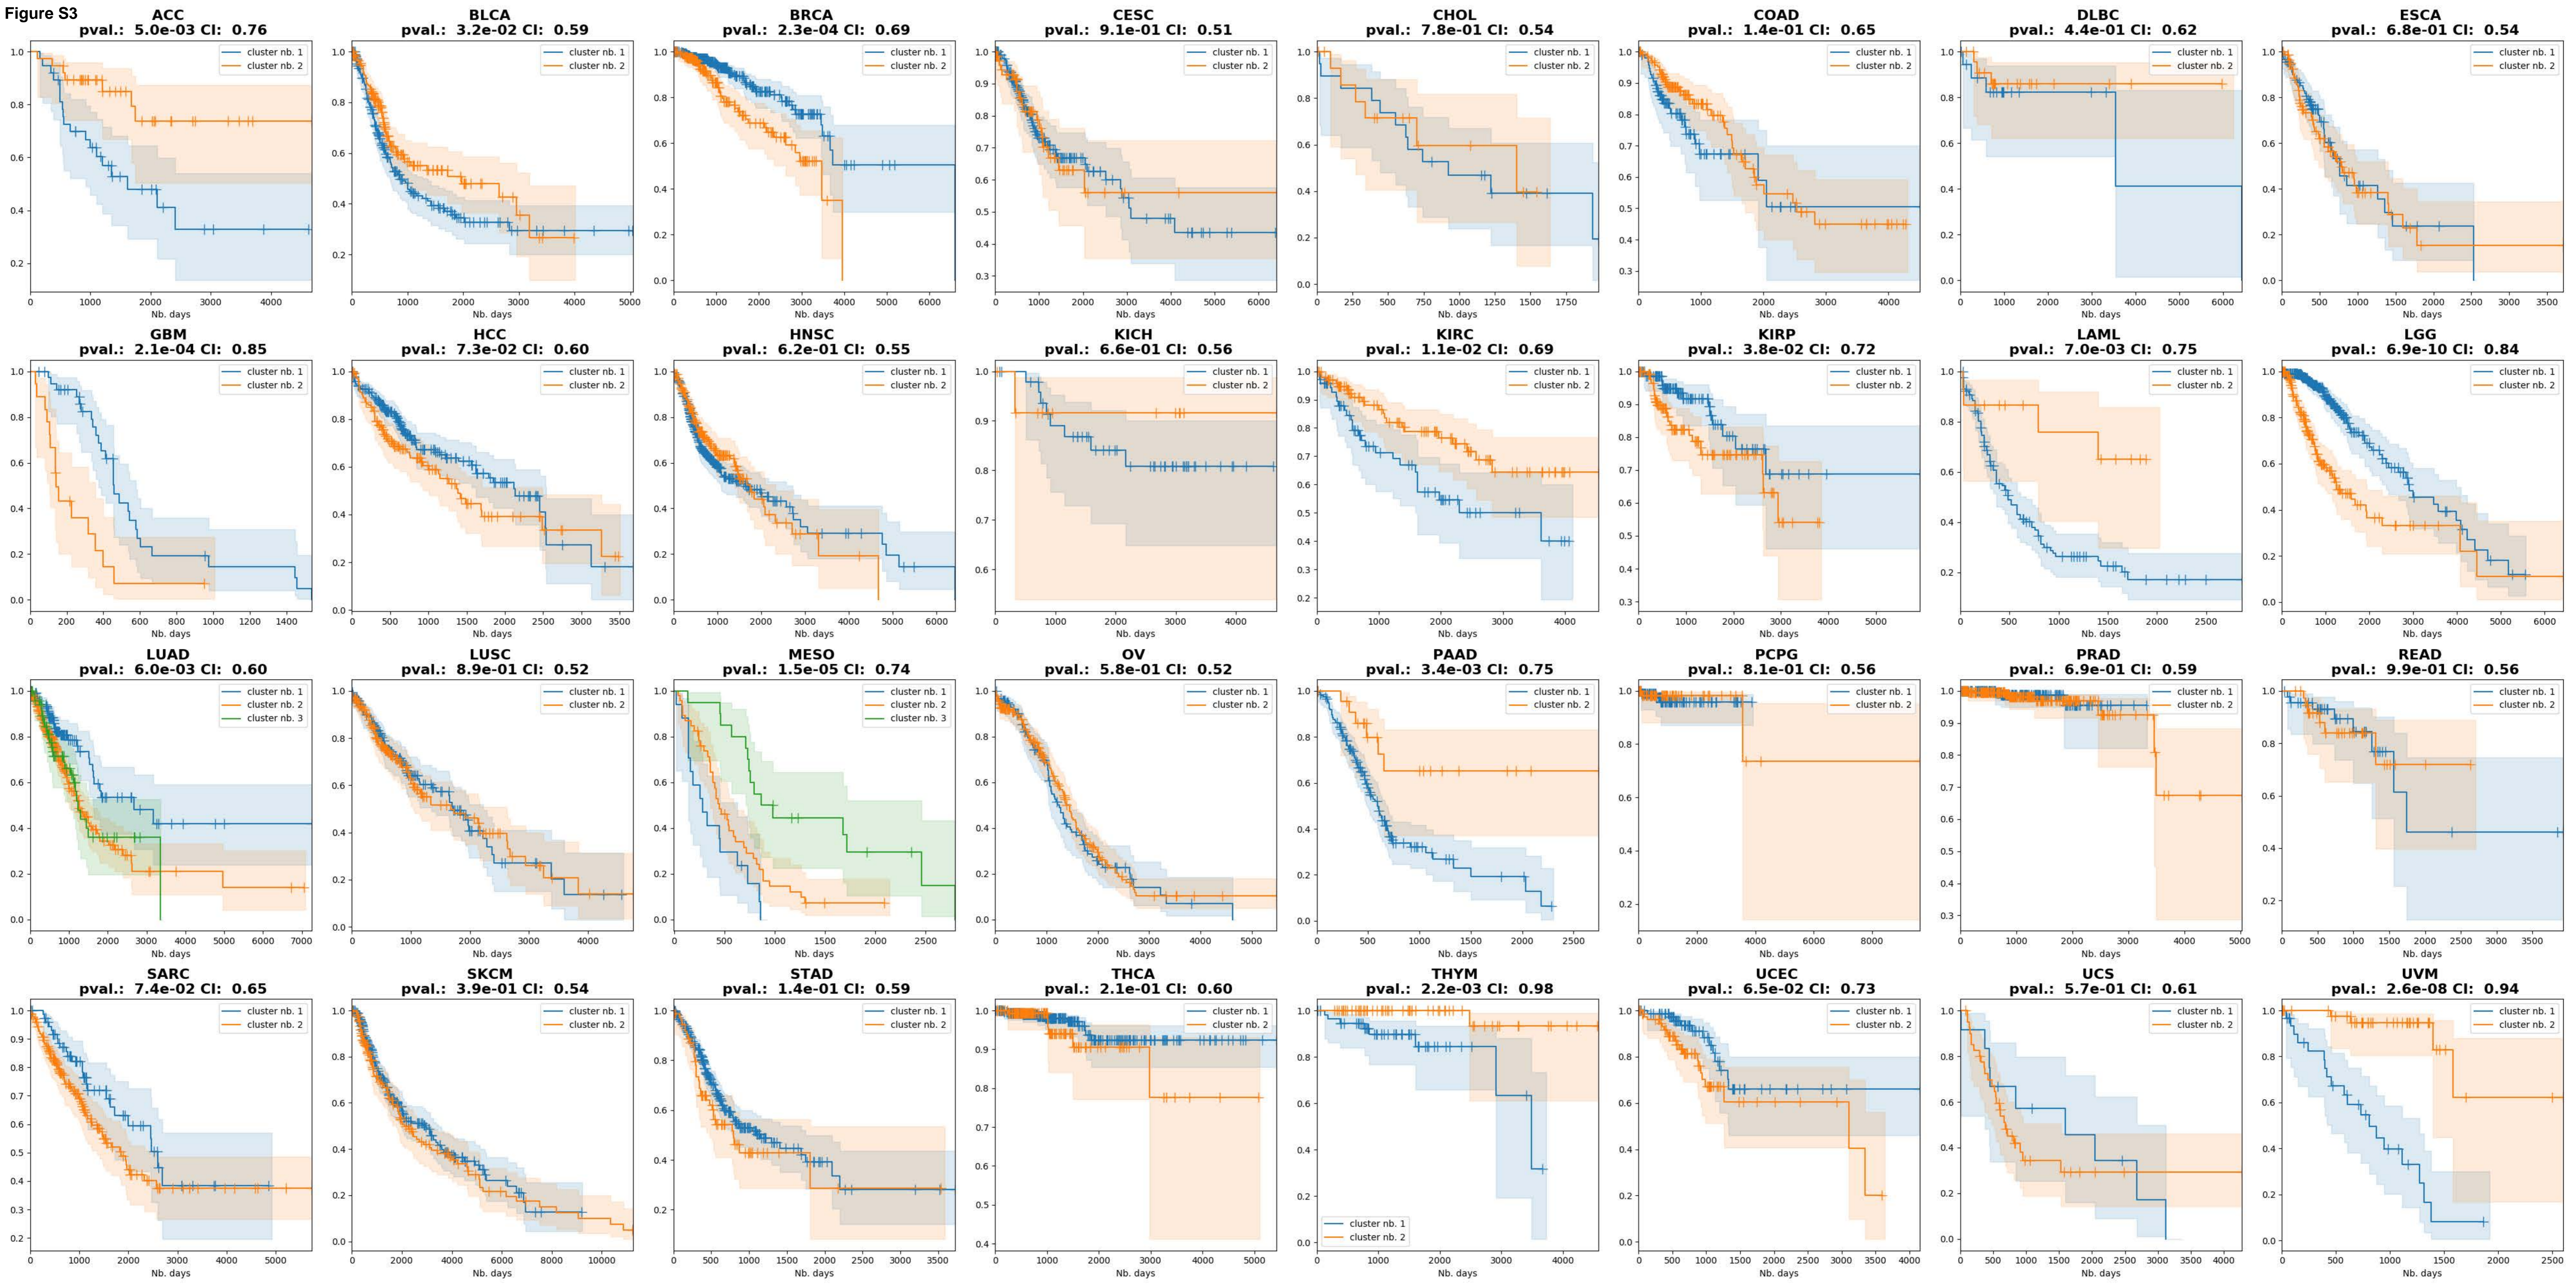

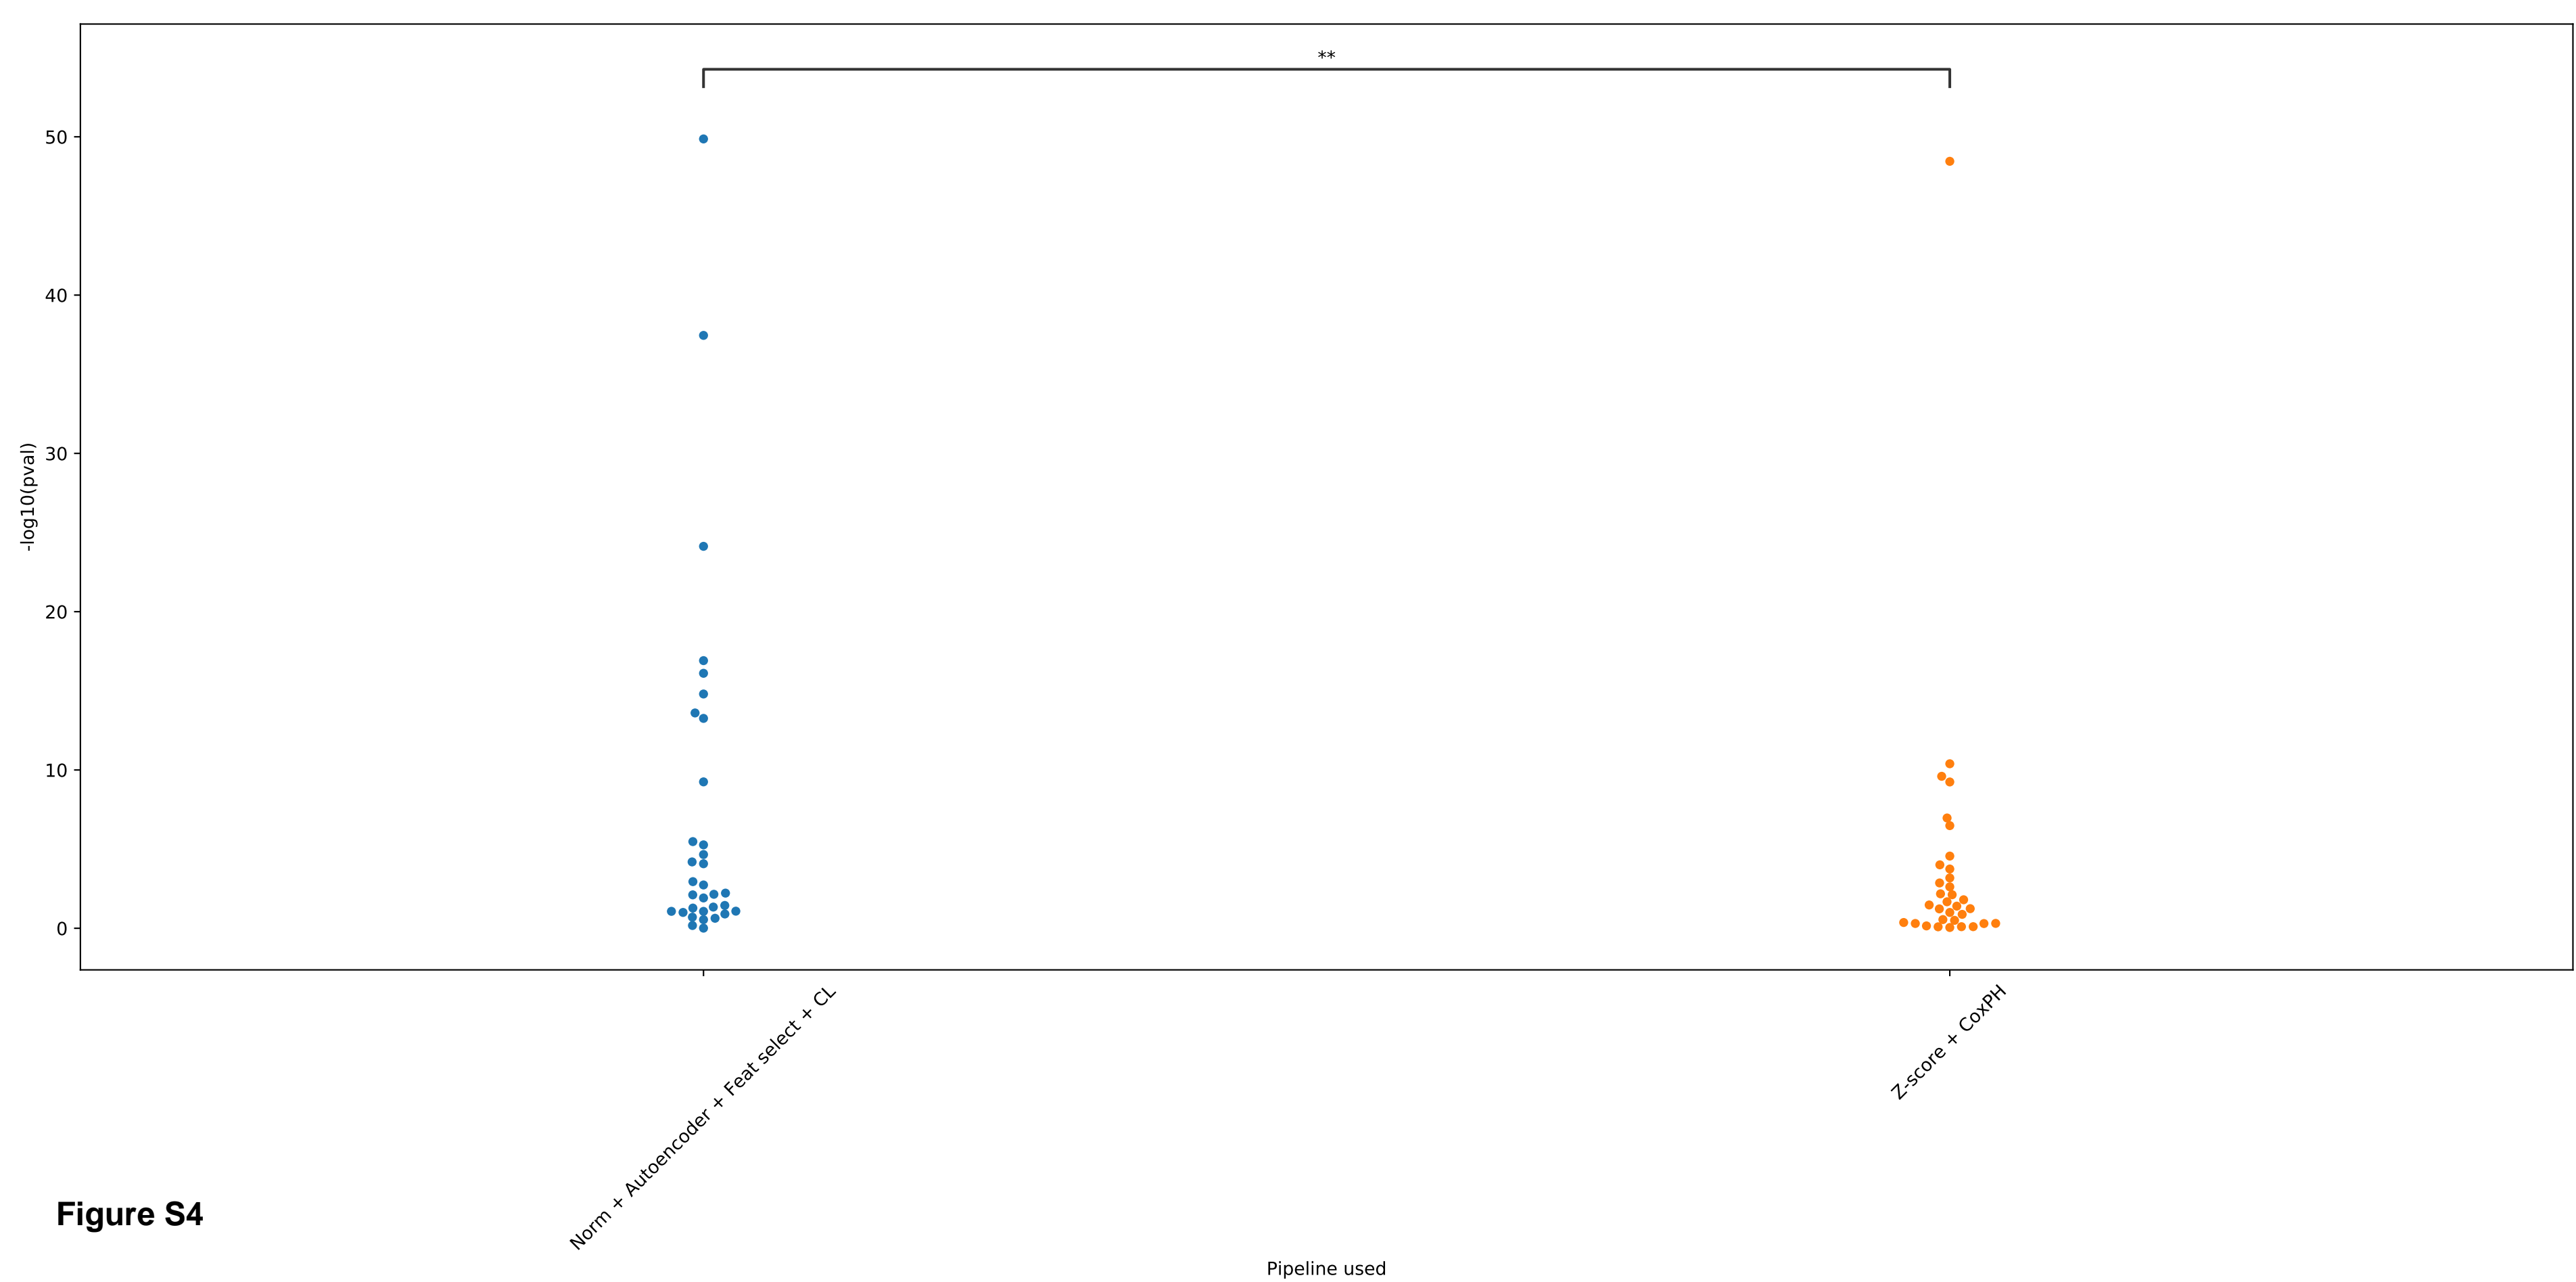

Figure S4

## COAD and READ RNA-Seq DeepProg only models

**COAD Training**pval.:  $3.3e-04$  CI:0.64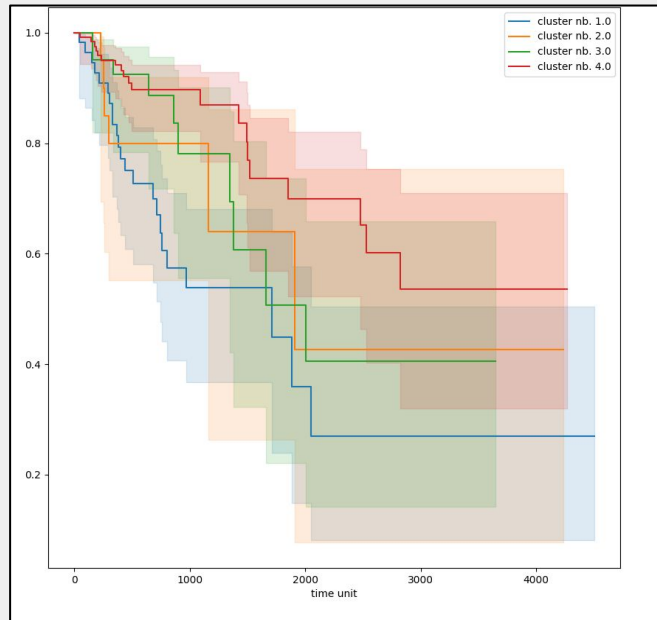**READ test**pval.:  $1.4e-02$  CI:0.70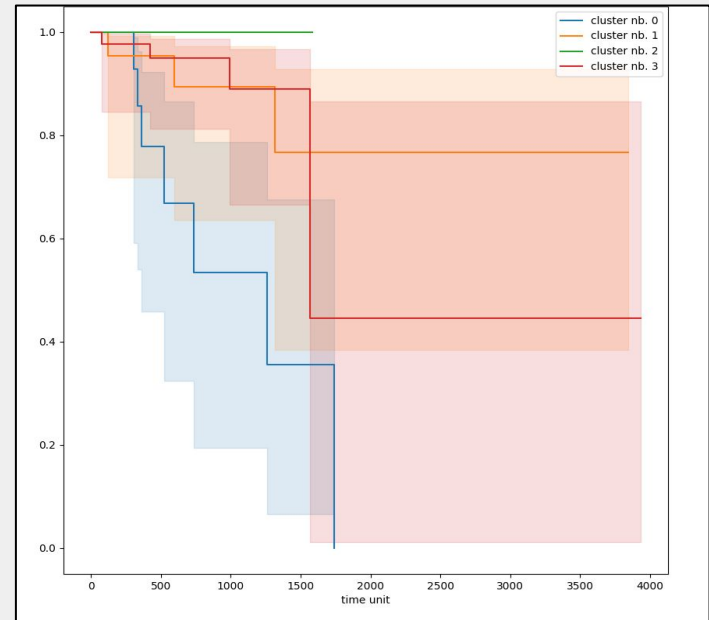**READ training**pval.:  $4.3e-03$  CI: 0.68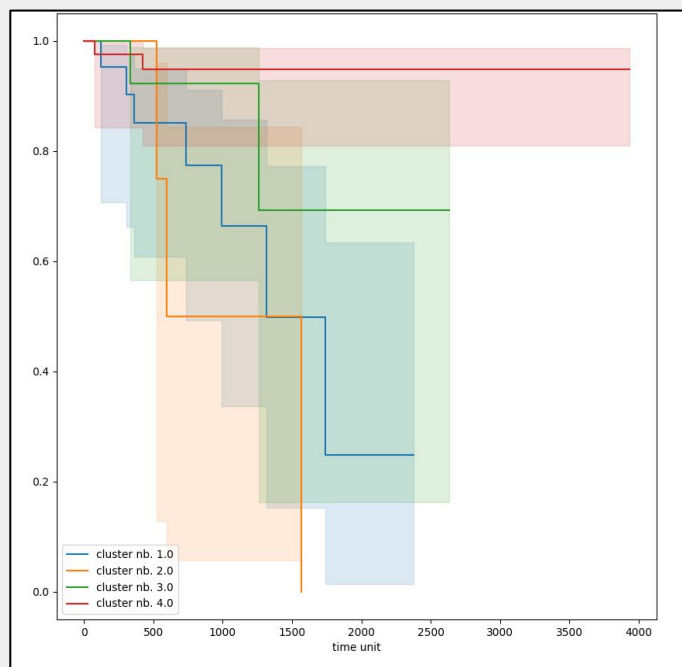**COAD test**pval.:  $5.7e-03$  CI: 0.62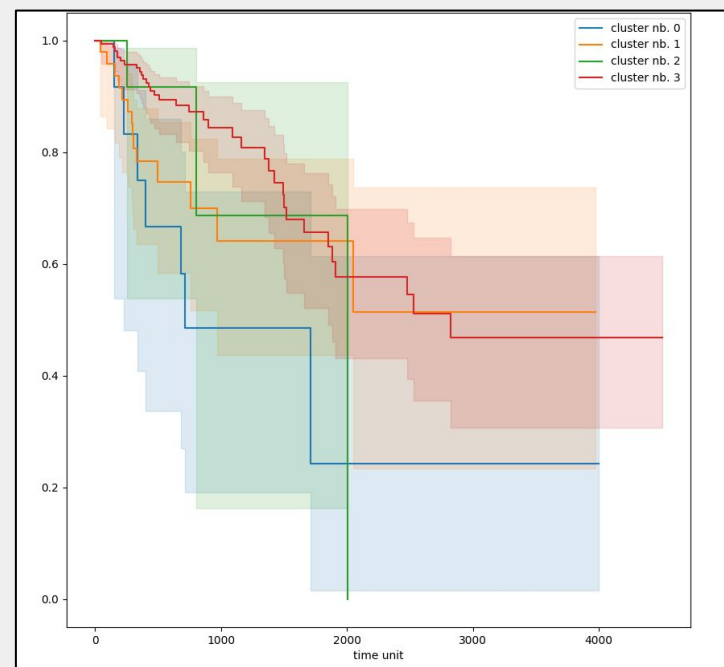

Supplement: 13073_2021_930_MOESM4_ESM.pdf [file 13073_2021_930_MOESM4_ESM.pdf]
