# Supplementary material for: DeepProg: an ensemble of deep-learning and machine-learning models for prognosis prediction using multi-omics data
Source: Genome Med. 2021 Jul 14;13:112. doi: 10.1186/s13073-021-00930-x (PMC8281595; doi:10.1186/s13073-021-00930-x)
Supplement: Supplementary file 7 — Additional File 7. Additional analysis of microRNA and methylation signatures between the worst survival subtype vs. the remaining samples in each cancer. [file 13073_2021_930_MOESM7_ESM.docx]

## Supplementary information for

**Multi-omics-based pan-cancer prognosis prediction using an ensemble of deep-learning and machine-learning models**

Olivier Poirion1, Kumardeep Chaudhary2, Sijia Huang3, Lana X. Garmire4*

**1** University of California San Diego, Center for Epigenomics, 9500 Gilman Dr, La Jolla, CA 92093, USA

**2** Icahn School of Medicine at Mount Sinai, Department of Genetics and Genomic Sciences, 1 Gustave L. Levy Pl, New York, NY 10029, USA

**3** University of Pennsylvania, Department of Biostatistics, Epidemiology and Informatics

Philadelphia, PA, 19104, USA

**4** University of Michigan, Department of Computational Medicine and Bioinformatics, Ann Arbor, MI 48105, USA

* Corresponding author.

Emails:

LXG: lgarmire@med.umich.edu

### Prognostic power of the different omics

To rank the relative prognostic importance among RNA-Seq, miRNA, and Methylation data, we next identify the hidden-layer features significantly linked to survival in DeepProg. Since the autoencoder transformed an individual omic matrix into a reduced latent space of 100 new features (**Figure 1**), we report the average number of significant survival features arising from these 100 latent features, for each omic data type and each cancer (**Supplementary Figure 1**). Overall, RNA-Seq has the most important contribution towards survival prediction (average 12.6 /100 significant features), followed closely by miRNA (average 10.8 / 100 features) and then DNA methylation (average 8.3 /100 features). Moreover, RNA-Seq is the most important feature type in 14 out of 32 cancers, compared to miRNA (10 cancers) and Methylation (9 cancers). There is also a wide range of variation for feature importance of each omic data type among cancers. For example, for KICH, the three omics have close to equal level of survival correlations (~5 significant hidden-layer features for each omic), whereas HCC has much different numbers of significant features, with a value of 28 for RNA, 10 for miRNA and 5 for DNA methylations.

### DNA methylation features

Strikingly, we find 15 genes from the Protocadherin Gamma Subfamily (PCDHG) hyper-methylated among the top 100 genes **(Supplementary Table 5)**. This superfamily of cell-adhesion molecules has their genes organized in clusters and hyper-methylation combined with under-expression of protocadherin clusters were described in multiple cancers 1. Additionally, xix genes (HOXD13, HOXC5, HOXC4, HOXD10, HOXB4, and HOXA6) from the homeobox (HOX) family are hyper-methylated in the top 100 genes. HOX genes are transcription factors that are involved in normal cell proliferation and development and are also known to be involved with cancer progression 2. For example, hyper-methylation of HOXD13 3, HOXC5, and HOXC4 4, were associated with poor prognosis and metastasis progression**.** Interestingly, GPD1 is ranked overall 2nd in our analysis, hyper-methylated in 13 cancers (aggressive subtype) and is associated with survival in 4 cancers. The strong association of GPD1 with tumor progression is new, in that previous literature on this aspect is lacking. The top 2 mostly hypomethylated genes are YOD1 (1st), and CYFIP1 (2nd). YOD1 is a deubiquitinase that acts as a regulator of the Hippo pathway and a potential therapeutic target to treat liver cancer5. Following the literature, YOD1 is significantly associated with survival in the TCGA HCC dataset (log-rank p-value =0.005). CYFIP1 is was shown essential for breast cancer metastasis6, and is also significantly associated with survival in the TCGA BRCA dataset (long-rank p-value=0.04).

#### miRNA expression signature

DeepProg pan-cancer analysis detects miR-130b (1st), miR-199-a1 (2nd) and miR-199-a2 (3rd) as the most over-expressed miRNA signatures, and miR-29c and miR101-1 as the most under-expressed miRNA signature (**Supplementary Table 5**). miR-130b over-expression was previously associated with HCC and Ewing sarcoma and metastasis proliferation 7,8. Both miR-199-a1 and miR-199-a2 up-regulation were associated with glioblastoma 9. On the other hand, miR-29c was shown to suppress metastasis invasion in nasopharyngeal carcinoma 10 and HCC 11, and miR-101-1 was characterized as a tumor suppressor and metastasis repressor in various cancers 12,13.

### References

1. Wang, K.-H. *et al.* Global methylation silencing of clustered proto-cadherin genes in cervical cancer: serving as diagnostic markers comparable to HPV. *Cancer Med.* **4**, 43–55 (2015).

2. Bhatlekar, S., Fields, J. Z. & Boman, B. M. HOX genes and their role in the development of human cancers. *J. Mol. Med.* **92**, 811–823 (2014).

3. Zhong, Z. *et al.* HOXD13 methylation status is a prognostic indicator in breast cancer. *Int. J. Clin. Exp. Pathol.* **8**, 10716–24 (2015).

4. Marzese, D. M. *et al.* Epigenome-wide DNA methylation landscape of melanoma progression to brain metastasis reveals aberrations on homeobox D cluster associated with prognosis. *Hum. Mol. Genet.* **23**, 226–38 (2014).

5. Kim, Y. & Jho, E. Deubiquitinase YOD1: the potent activator of YAP in hepatomegaly and liver cancer. *BMB Rep.* **50**, 281 (2017).

6. Teng, Y. *et al.* The WASF3--NCKAP1--CYFIP1 complex is essential for breast cancer metastasis. *Cancer Res.* **76**, 5133–5142 (2016).

7. Chang, R.-M., Xu, J.-F., Fang, F., Yang, H. & Yang, L.-Y. MicroRNA-130b promotes proliferation and EMT-induced metastasis via PTEN/p-AKT/HIF-1α signaling. *Tumor Biol.* **37**, 10609–10619 (2016).

8. Satterfield, L. *et al.* miR-130b directly targets ARHGAP1 to drive activation of a metastatic CDC42-PAK1-AP1 positive feedback loop in Ewing sarcoma. *Int. J. Cancer* **141**, 2062–2075 (2017).

9. Gu, S. *et al.* Molecular Mechanisms of Regulation and Action of microRNA-199a in Testicular Germ Cell Tumor and Glioblastomas. *PLoS One* **8**, e83980 (2013).

10. Liu, N. *et al.* MiR-29c suppresses invasion and metastasis by targeting TIAM1 in nasopharyngeal carcinoma. *Cancer Lett.* **329**, 181–188 (2013).

11. Lu, Y. *et al.* MiR-29c inhibits cell growth, invasion, and migration of pancreatic cancer by targeting ITGB1. *Onco. Targets. Ther.* **9**, 99–109 (2016).

12. CHO, H. M. *et al.* microRNA-101 inhibits lung cancer invasion through the regulation of enhancer of zeste homolog 2. *Exp. Ther. Med.* **2**, 963–967 (2011).

13. Tang, X.-R. *et al.* MicroRNA-101 inhibits invasion and angiogenesis through targeting ITGA3 and its systemic delivery inhibits lung metastasis in nasopharyngeal carcinoma. *Cell Death Dis.* **8**, e2566–e2566 (2017).
